# Supplementary material for: Agonists and hydrogen peroxide mediate hyperoxidation of β2-adrenergic receptor in airway epithelial cells: Implications for tachyphylaxis to β2-agonists in constrictive airway disorders
Source: PubMed Central journal article supplement (PMC10842251; doi:10.1016/j.biopha.2023.115763), 2023-10-20

## Supplementary Figures

Singh K and Moniri NH.  $\beta$ 2-adrenergic receptor-reactive oxygen species signaling axis in small airway epithelial cells: agonist and H<sub>2</sub>O<sub>2</sub>-mediated hyperoxidation of  $\beta$ 2AR and implications for tachyphylaxis to  $\beta$ 2-agonists.

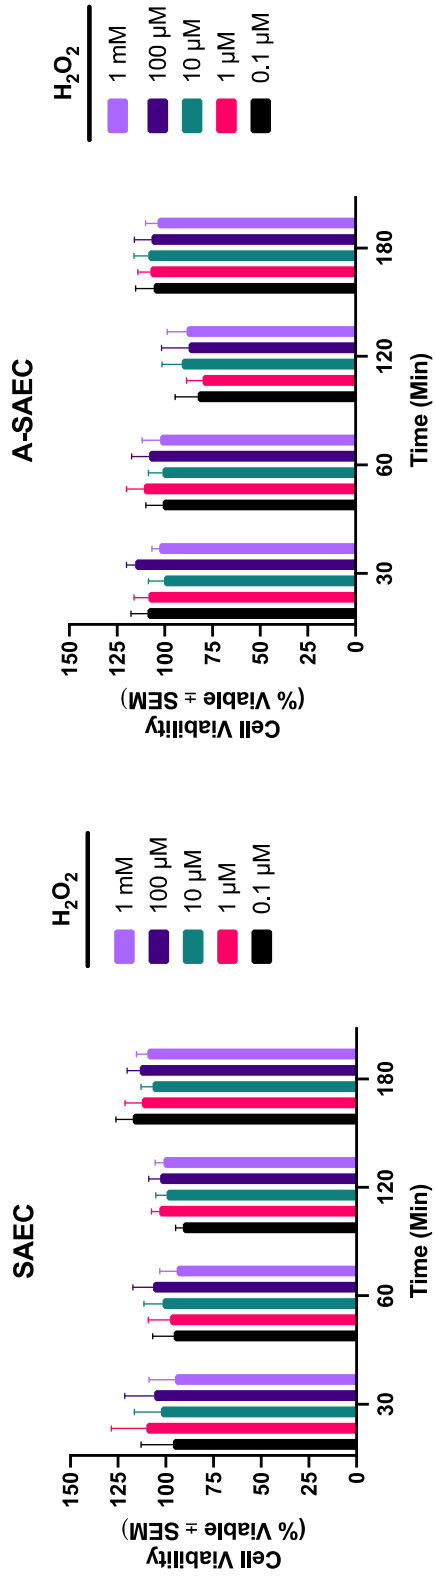

**Supplementary Figure 1:** Cell viability assays of SAEC and A-SAEC in the presence of increasing concentrations of H<sub>2</sub>O<sub>2</sub> for 30-180 min yields no significant differences in cell viability.

# Full length immunoblot replicates from figure 2A:

## SAEC blots:

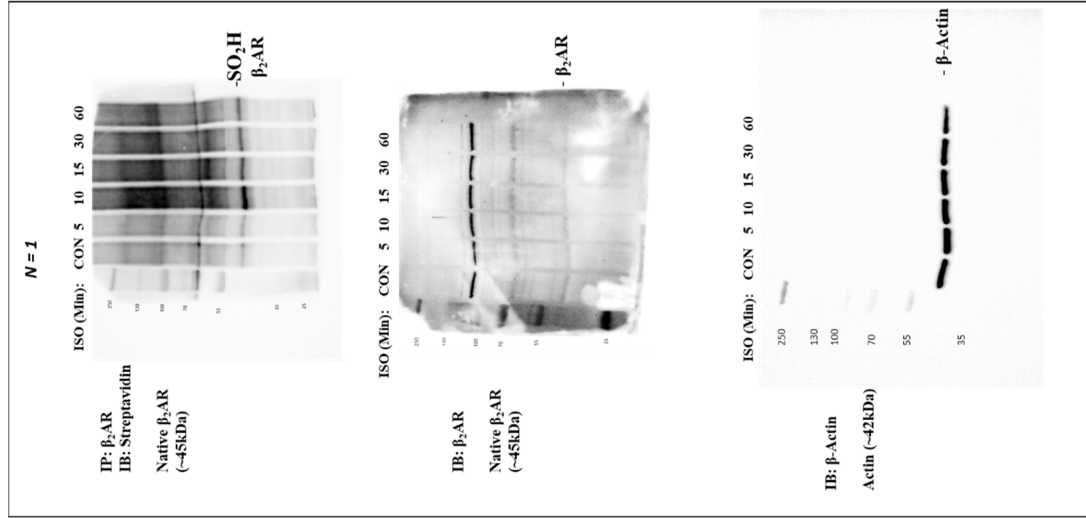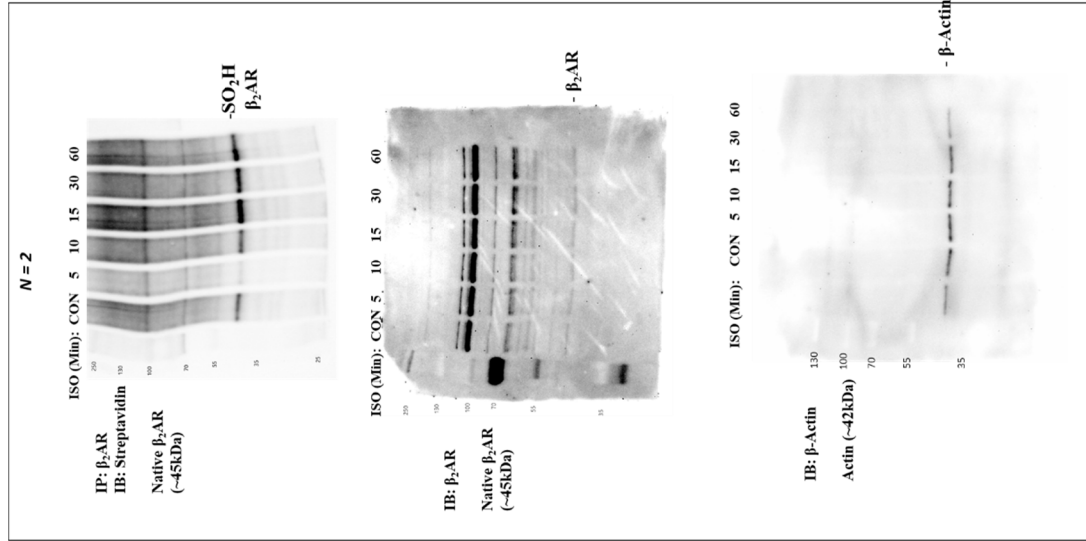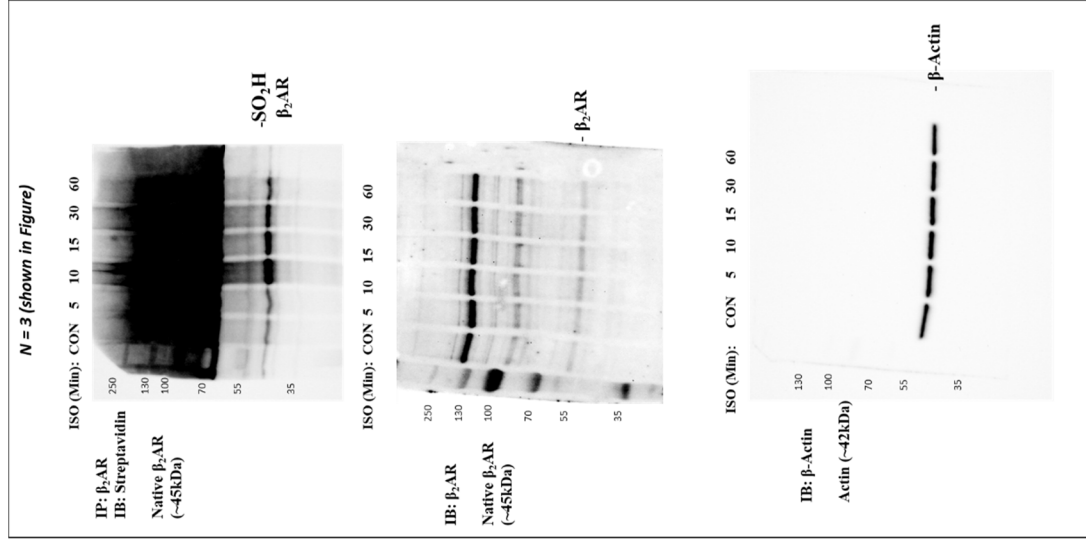

# Full length immunoblot replicates from figure 2A:

## A-SAEC blots:

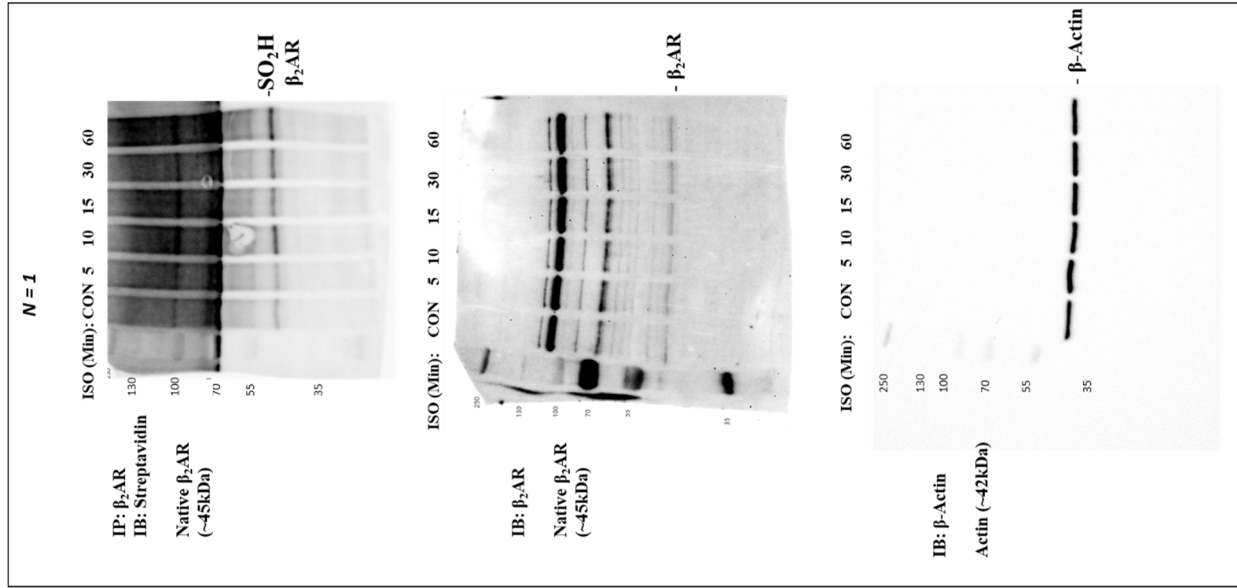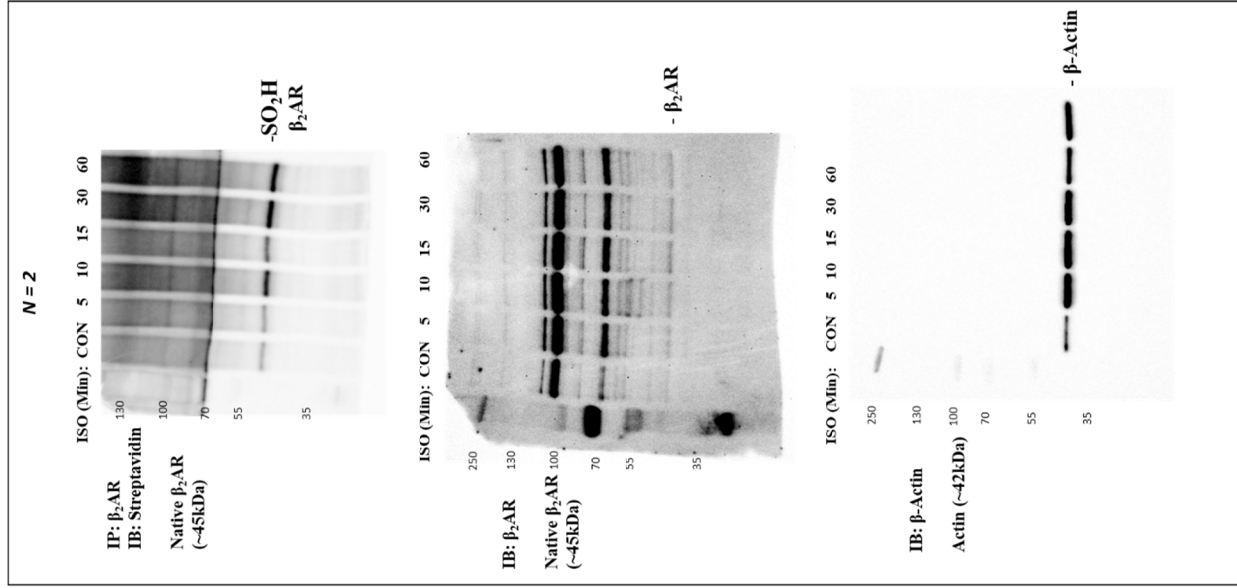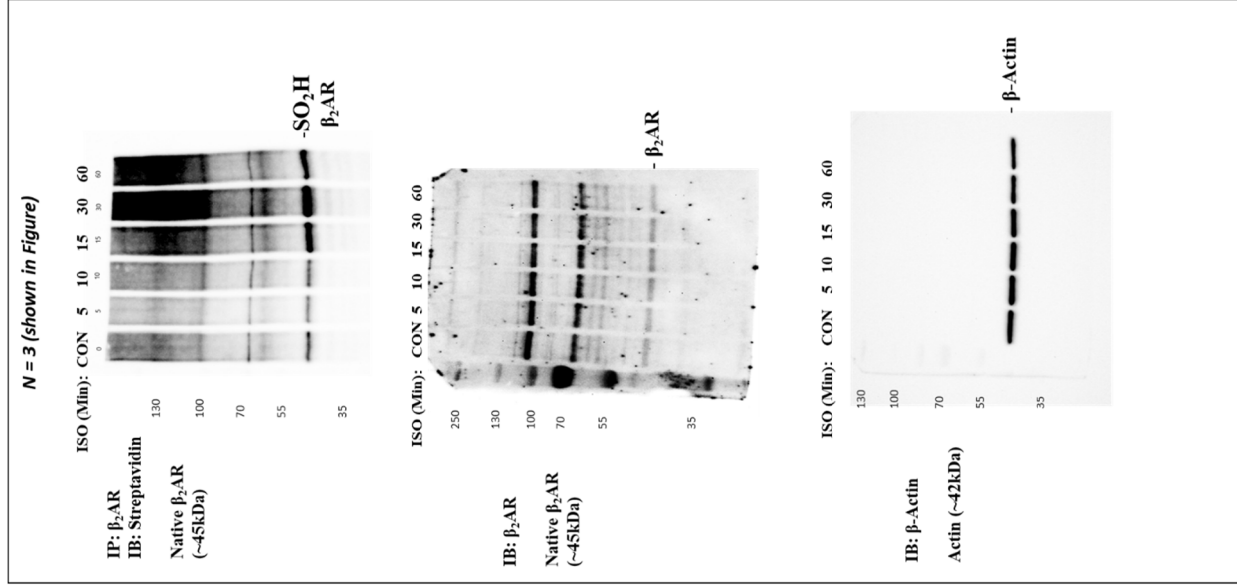

# Full length immunoblot replicates from figure 2B:

## SAEC blots:

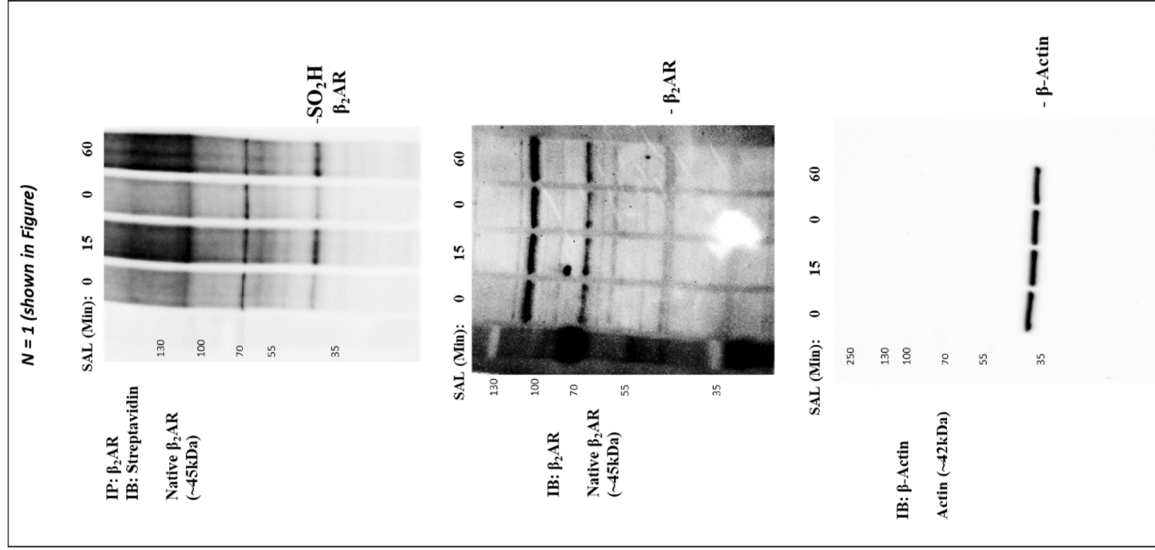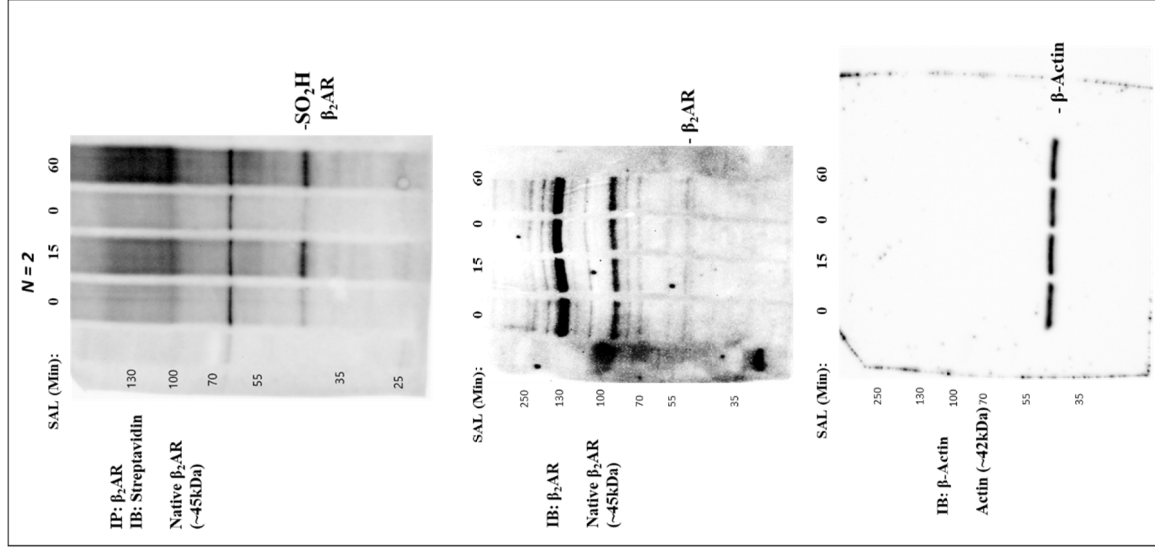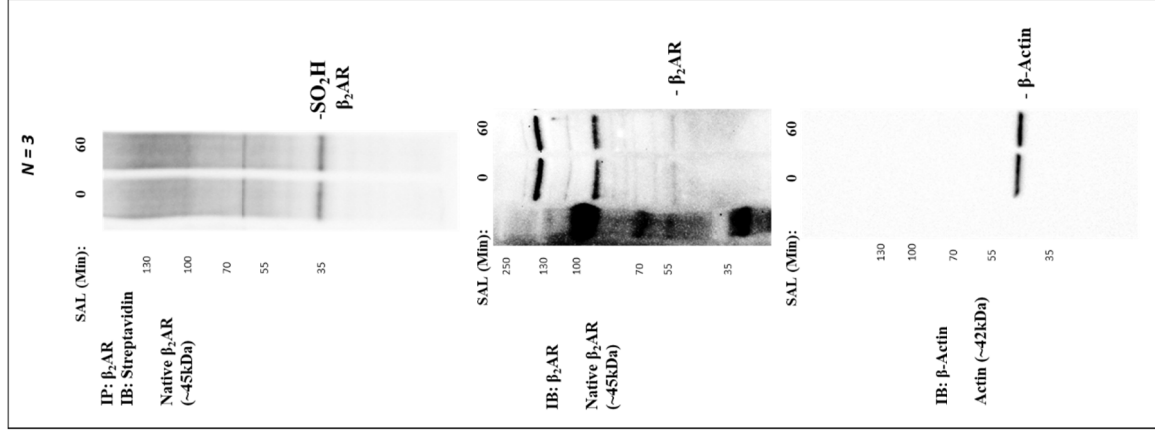

# Full length immunoblot replicates from figure 2B:

## A-SAEC blots:

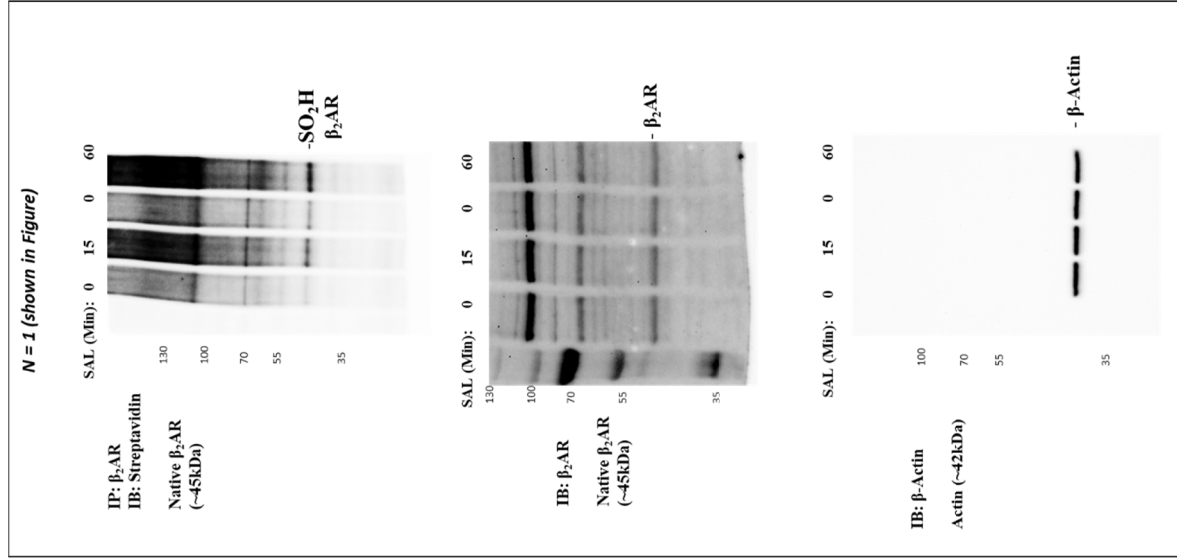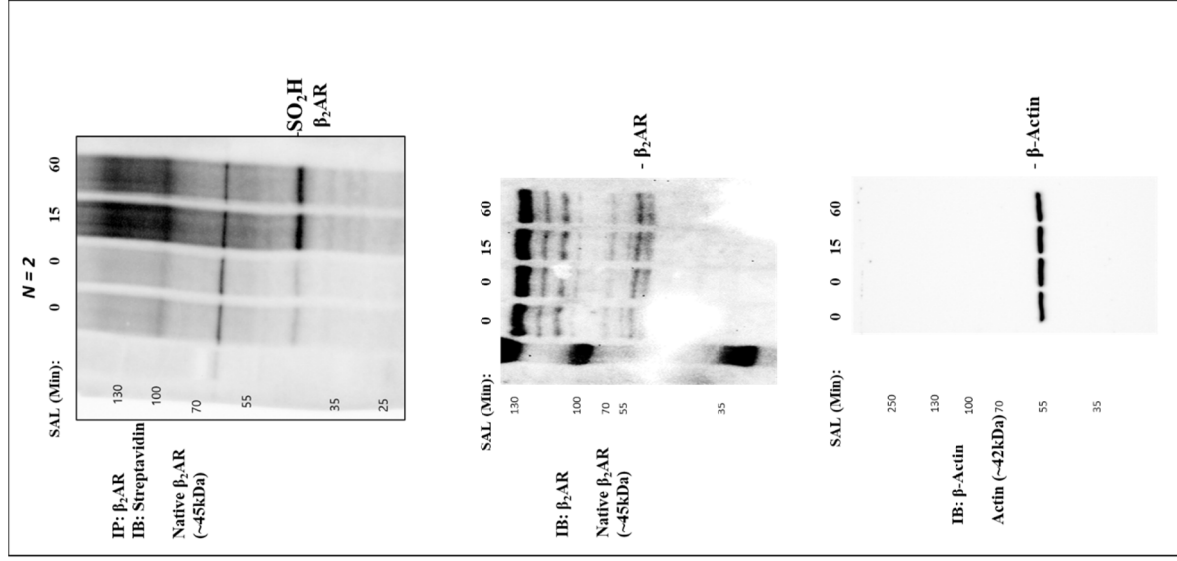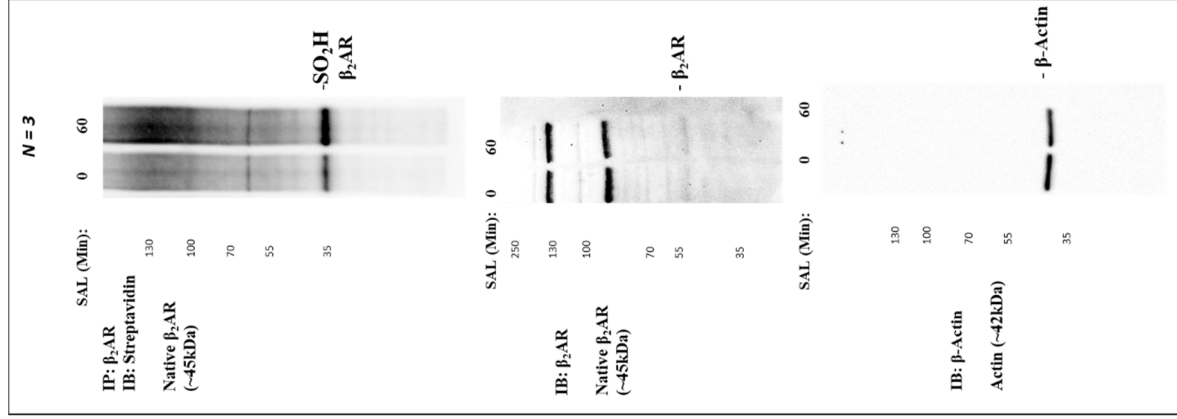

# Full length immunoblot replicates from figure 2C:

## SAEC – ISO blots

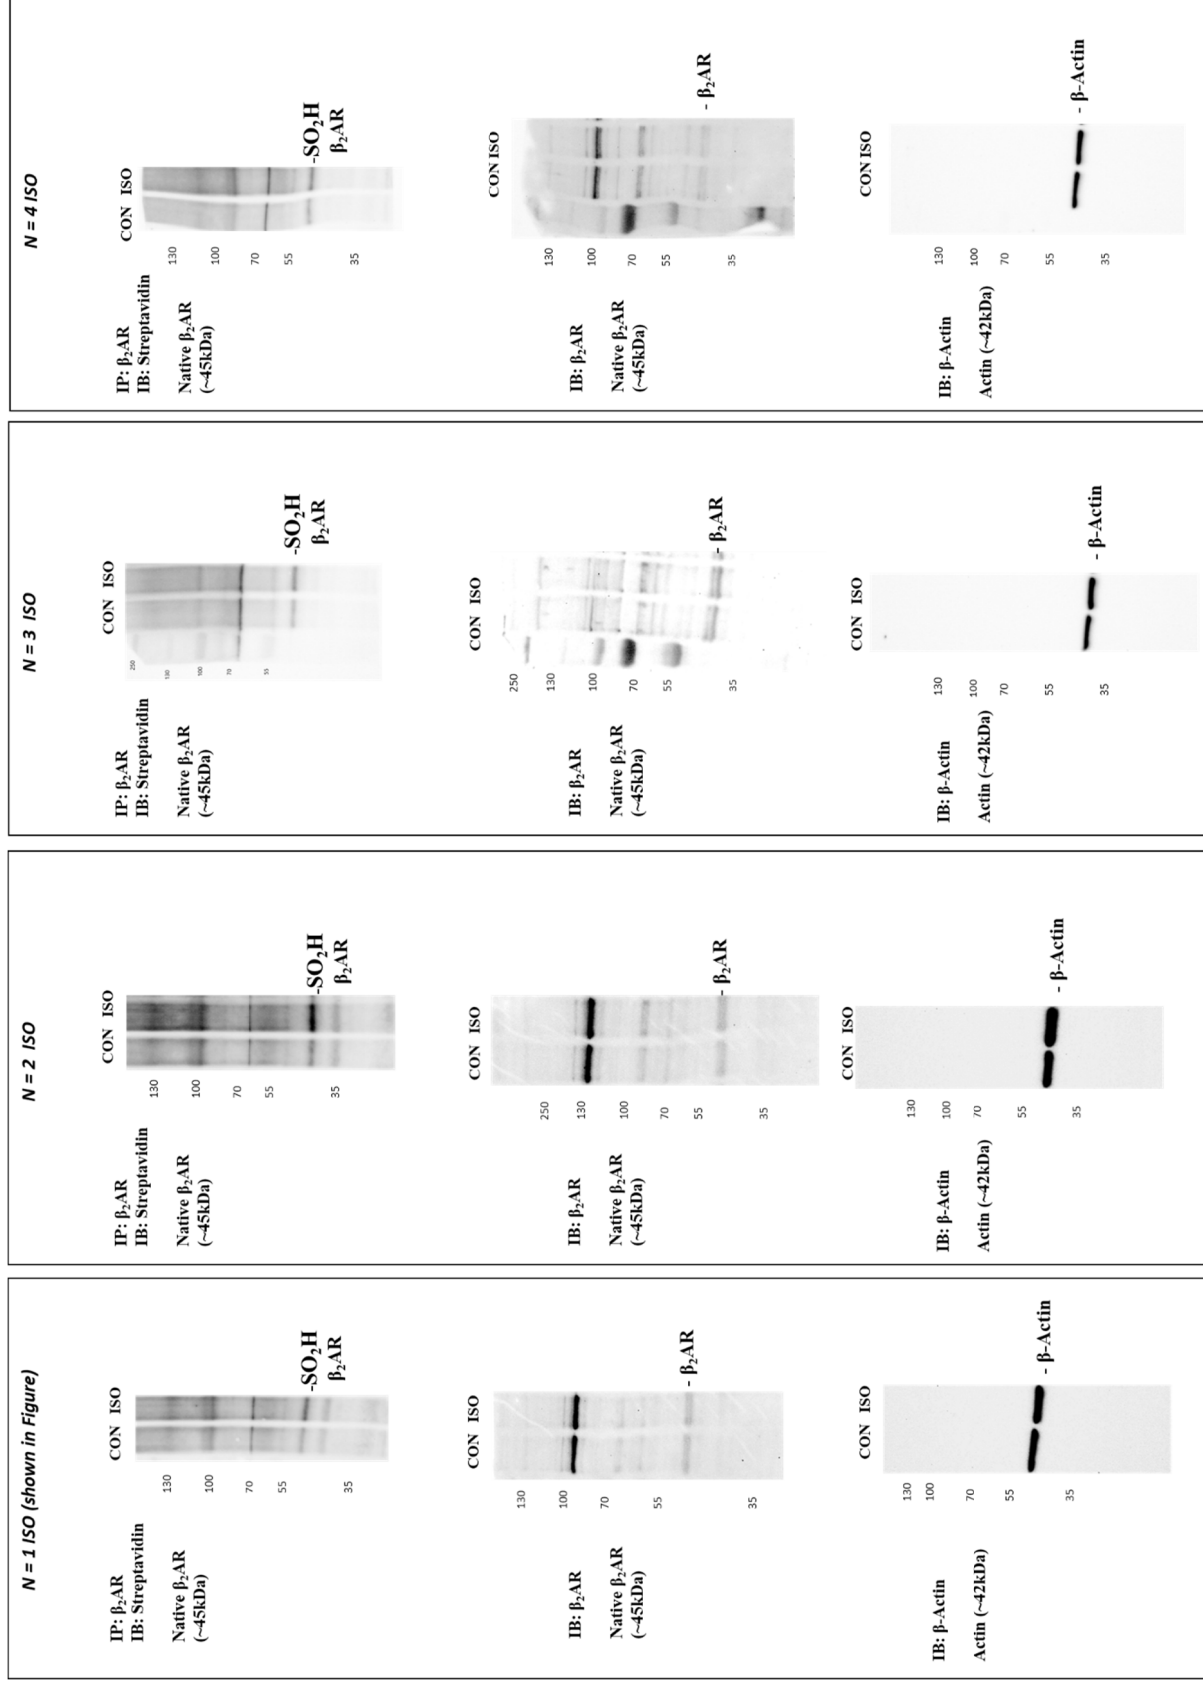

Full length immunoblot replicates from figure 2C:

SAEC – H<sub>2</sub>O<sub>2</sub> blots

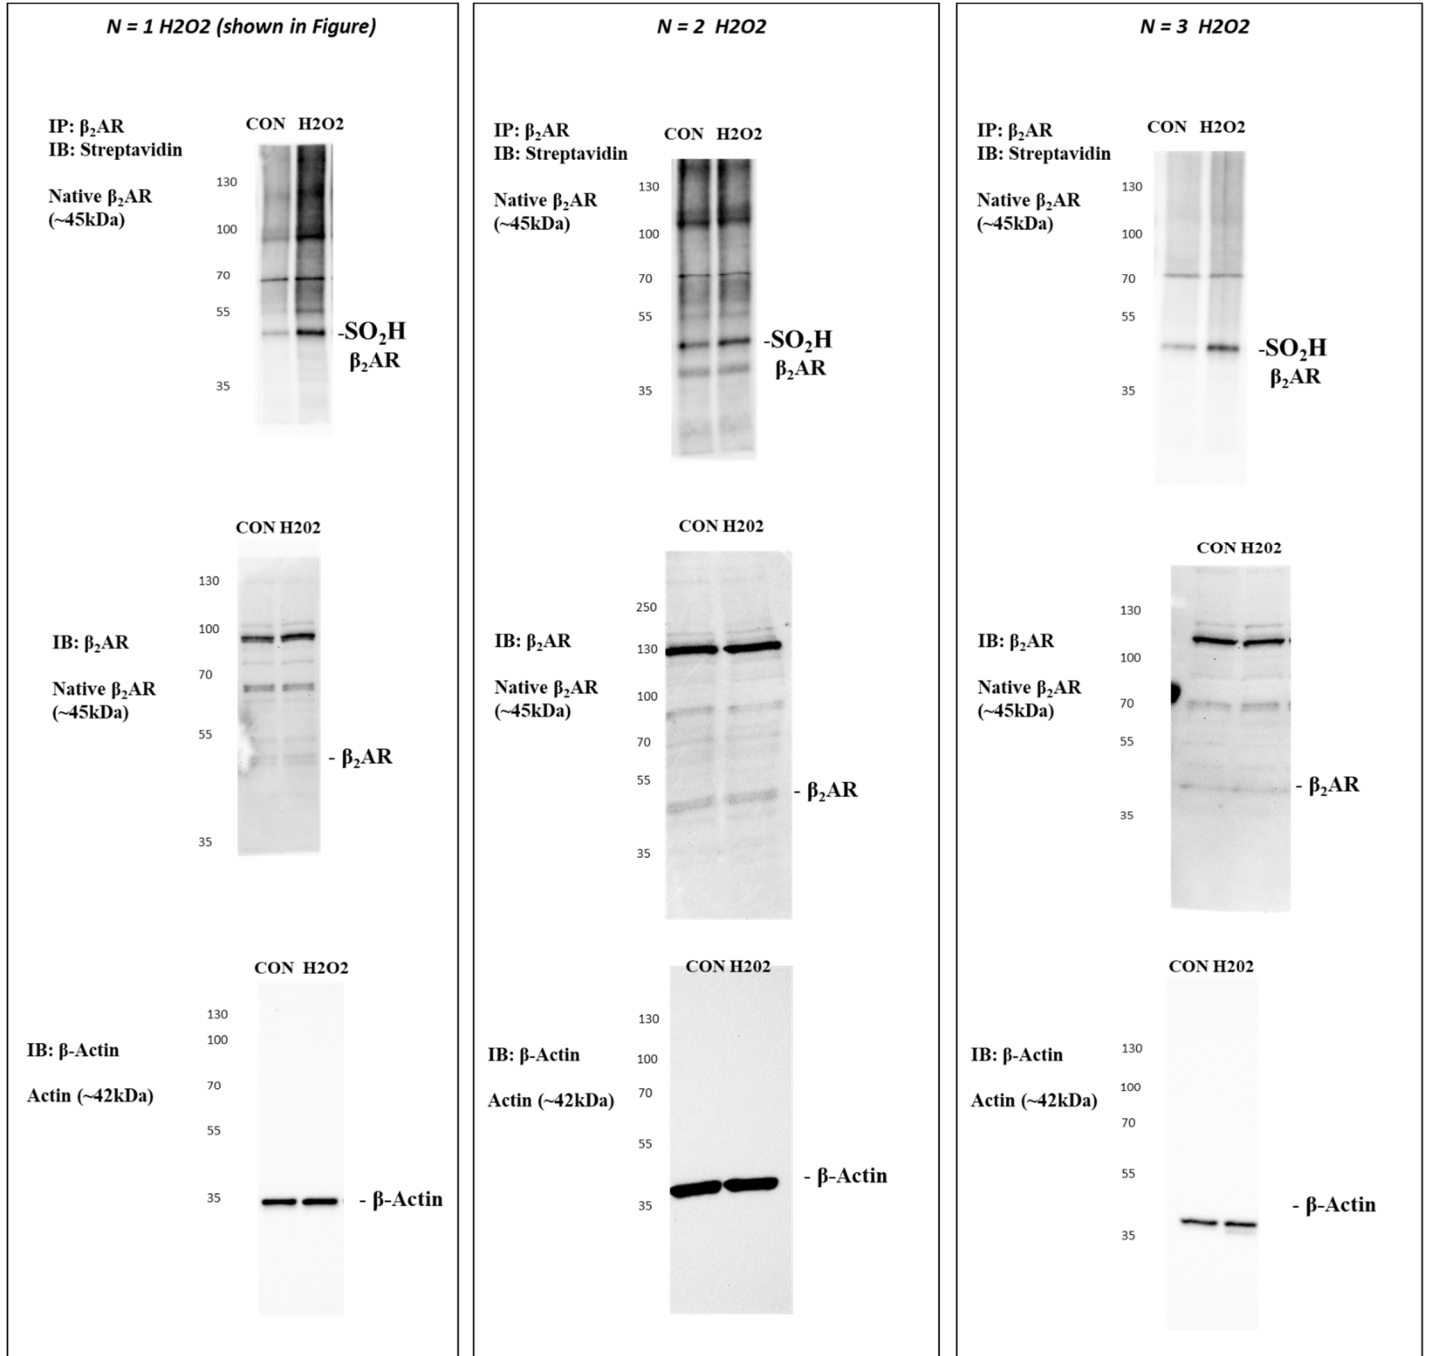

Full length immunoblot replicates from figure 2C:

A-SAEC – ISO blots

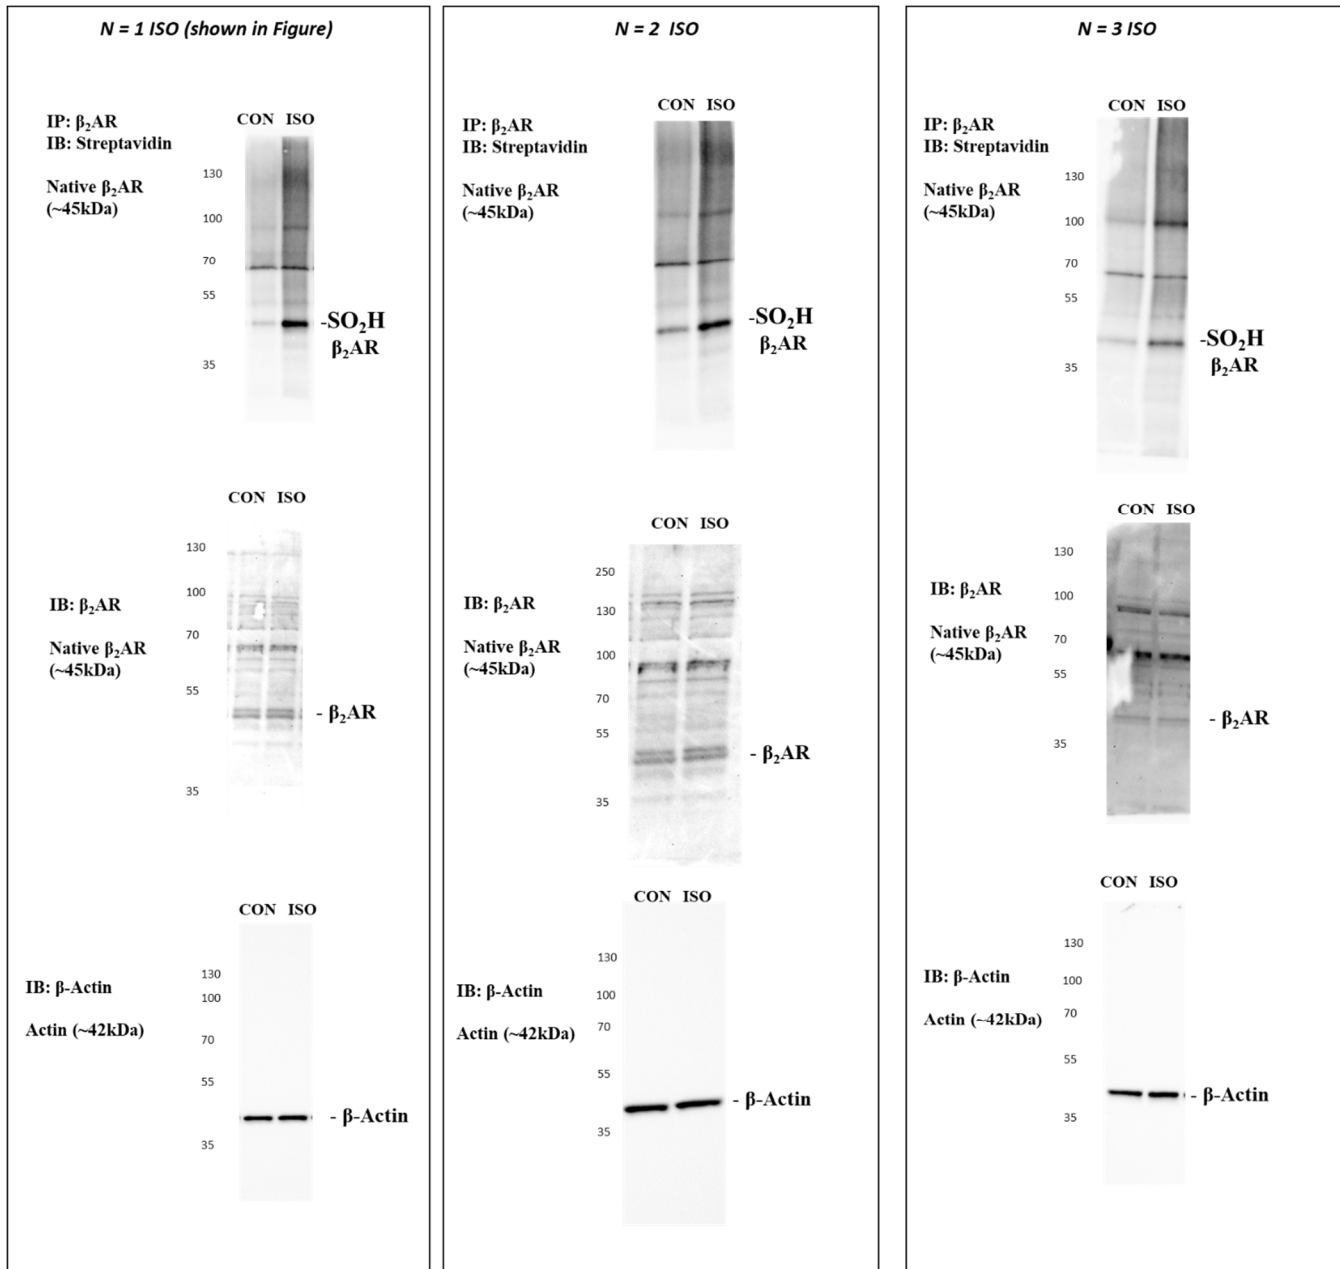



Full length immunoblot replicates from figure 2C:

A-SAEC – H<sub>2</sub>O<sub>2</sub> blots

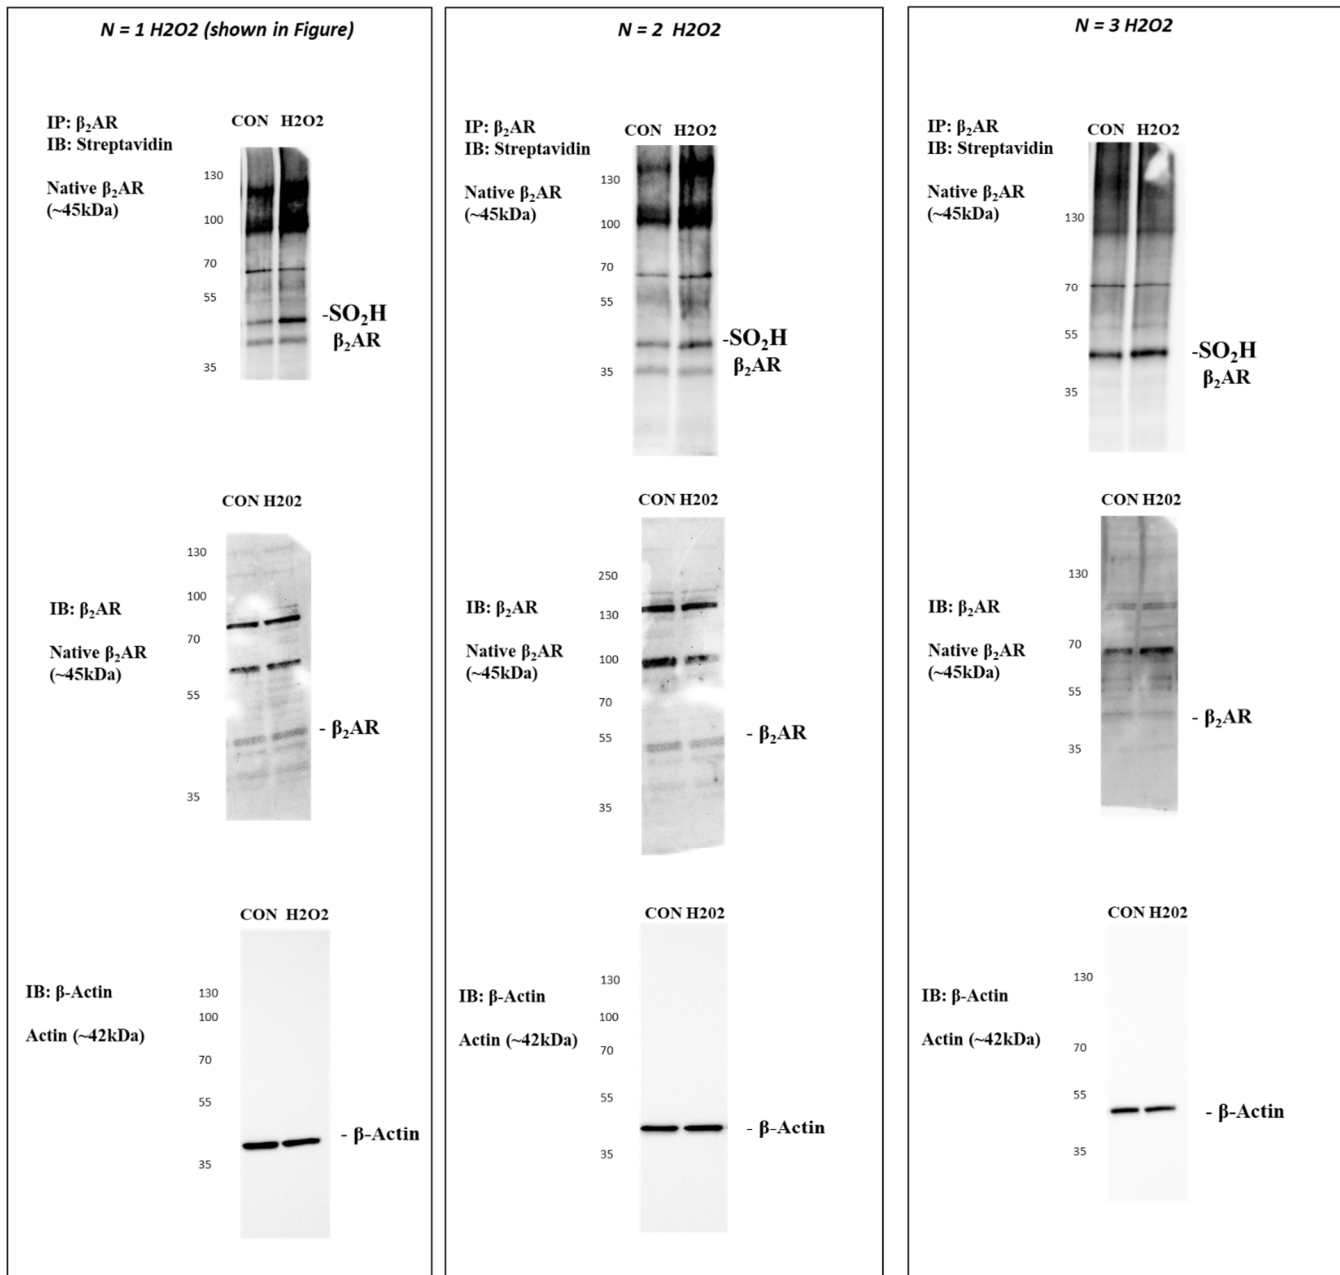

Full length immunoblot replicates from figure 6A:

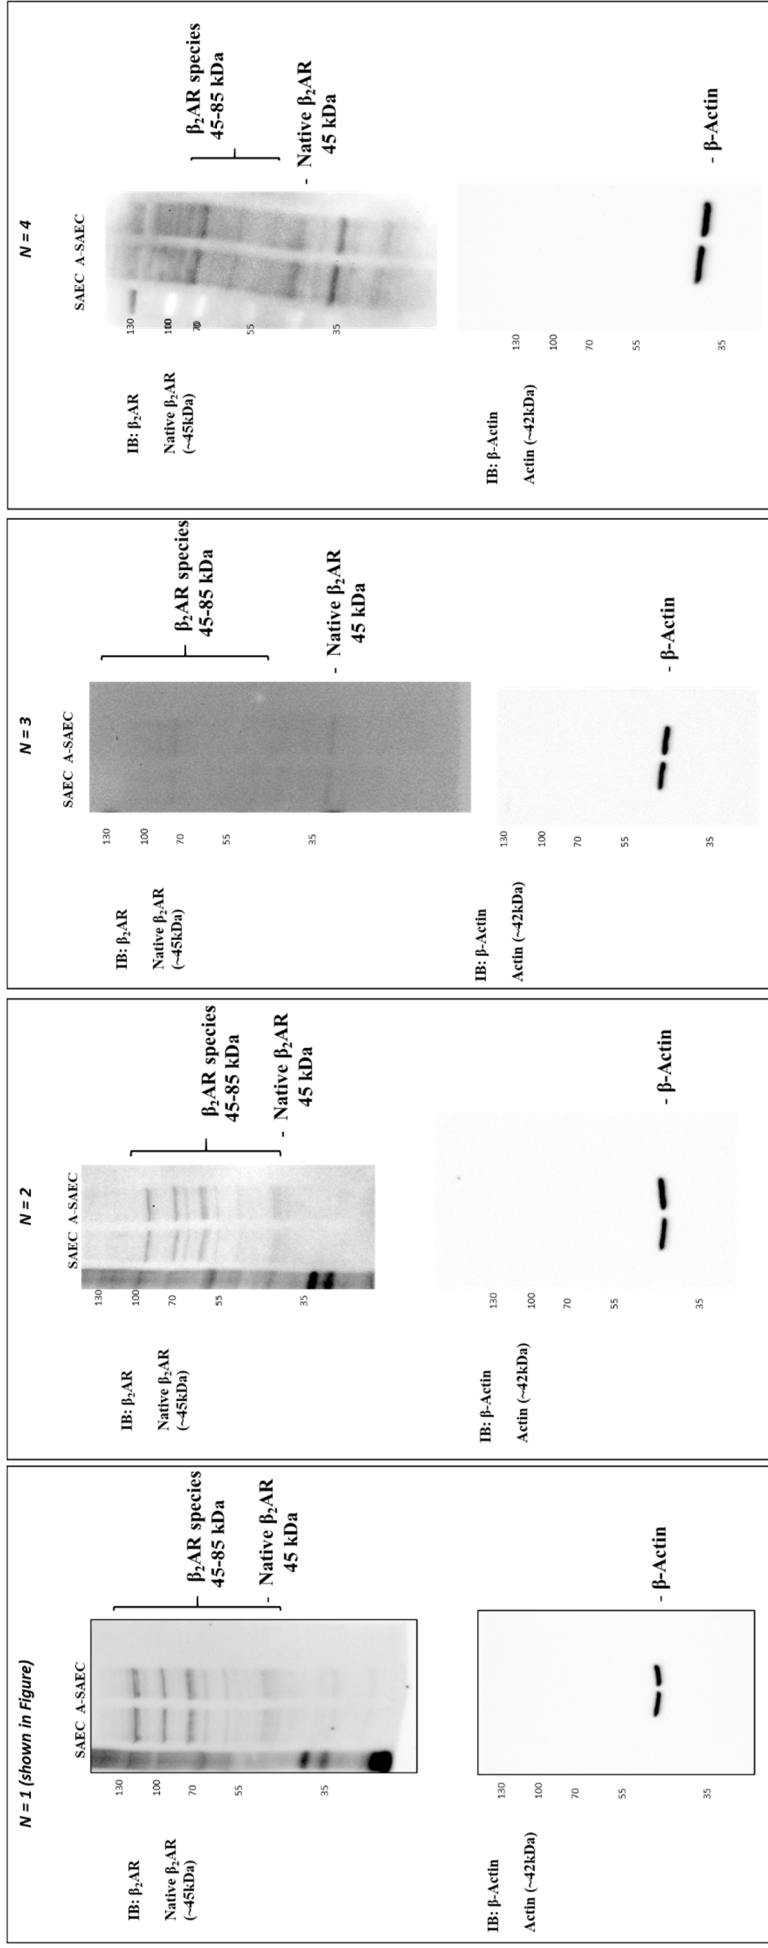

Full length immunoblot replicates from figure 6B:

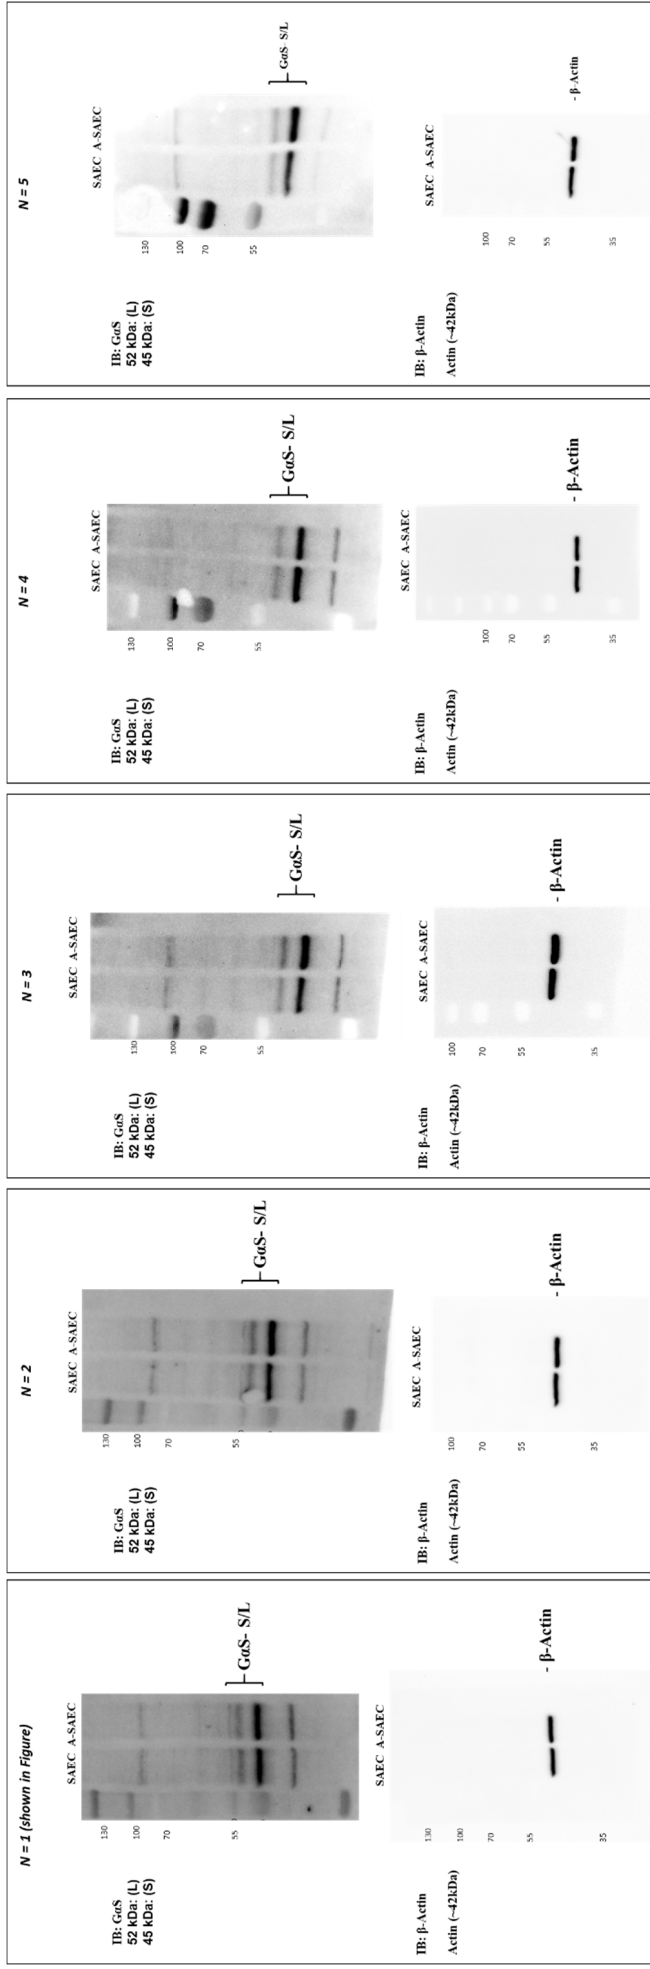

Full length immunoblot replicates from figure 6C:

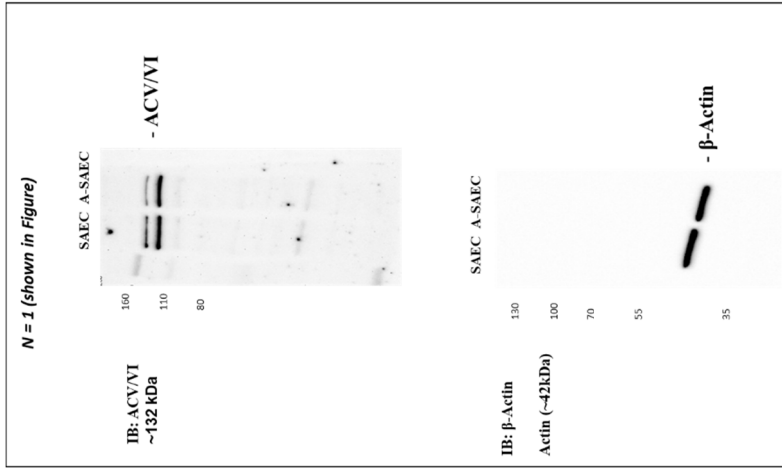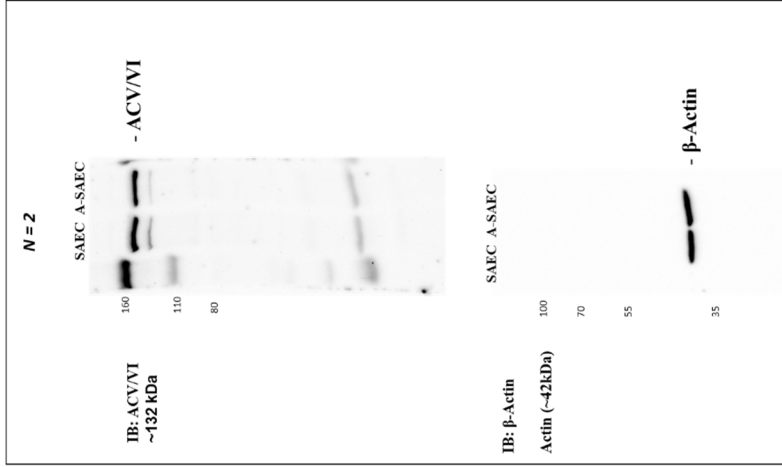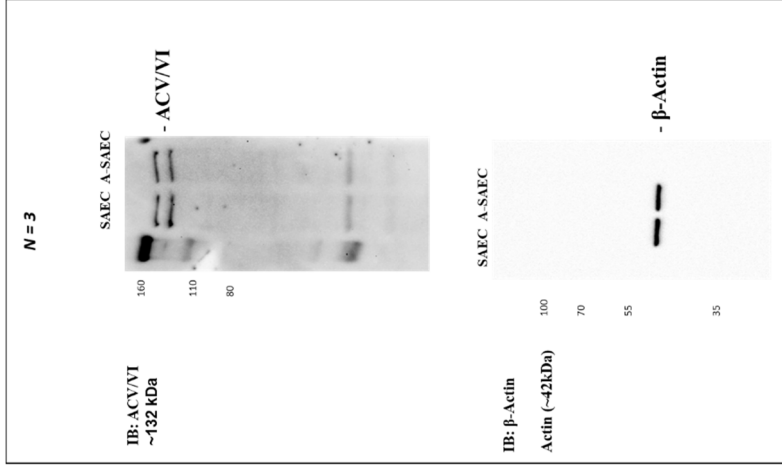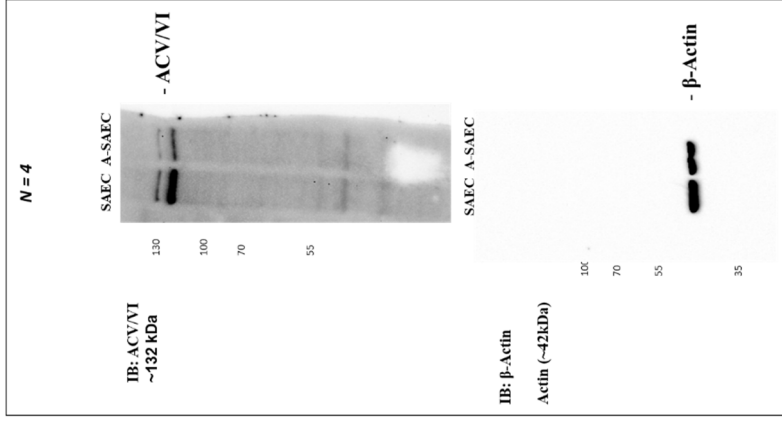

Full length immunoblot replicates from figure 6D:

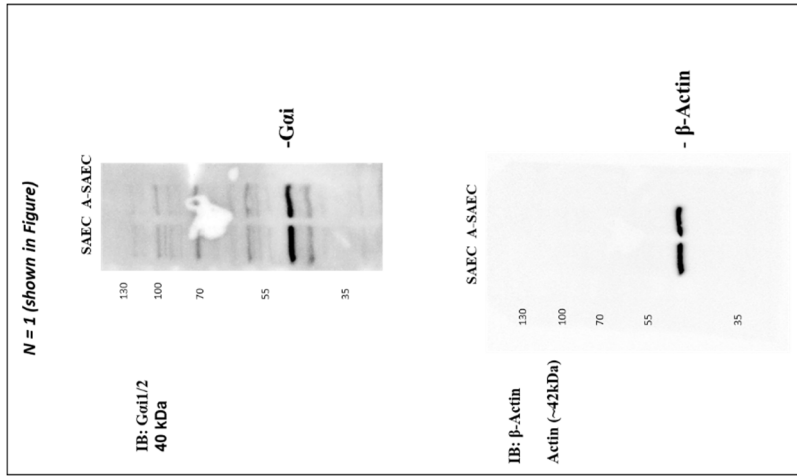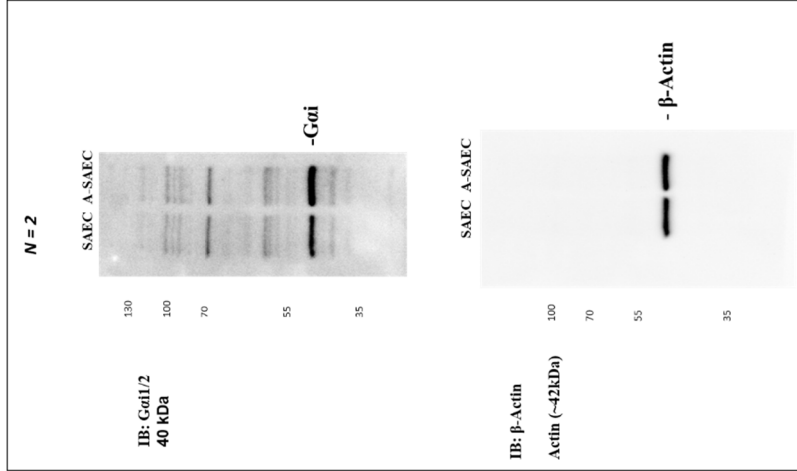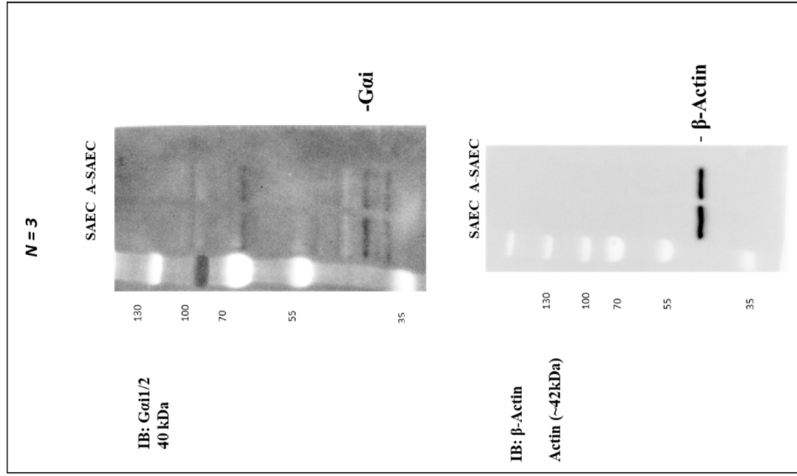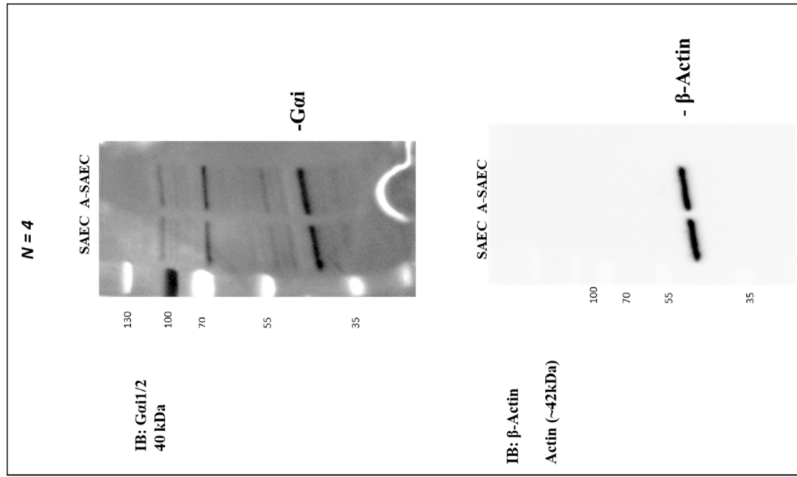

Full length immunoblot replicates from figure 6E:

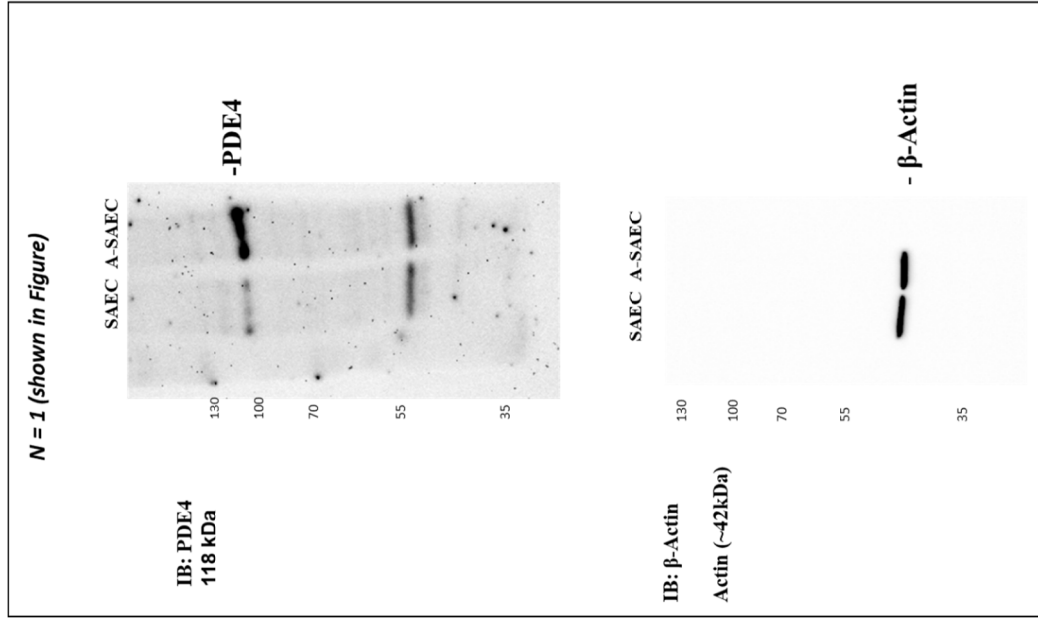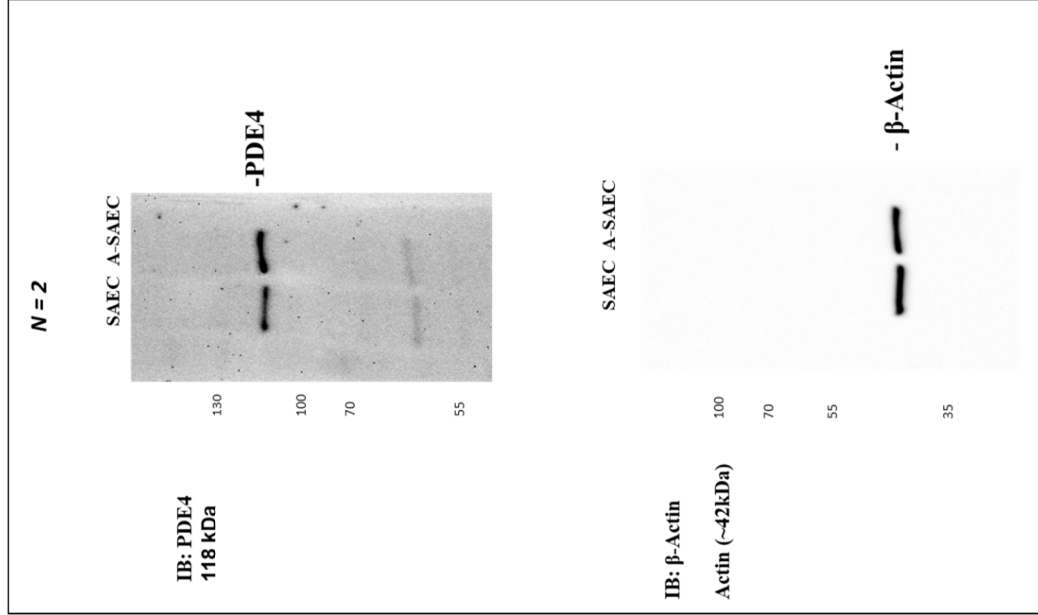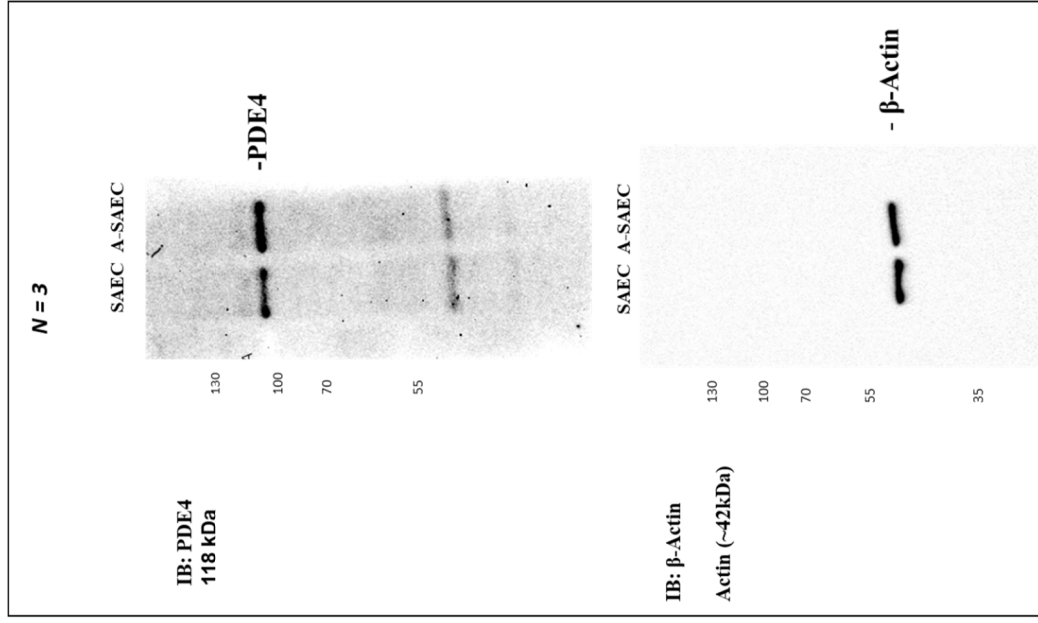

Full length immunoblot replicates from figure 6F (SOD1):

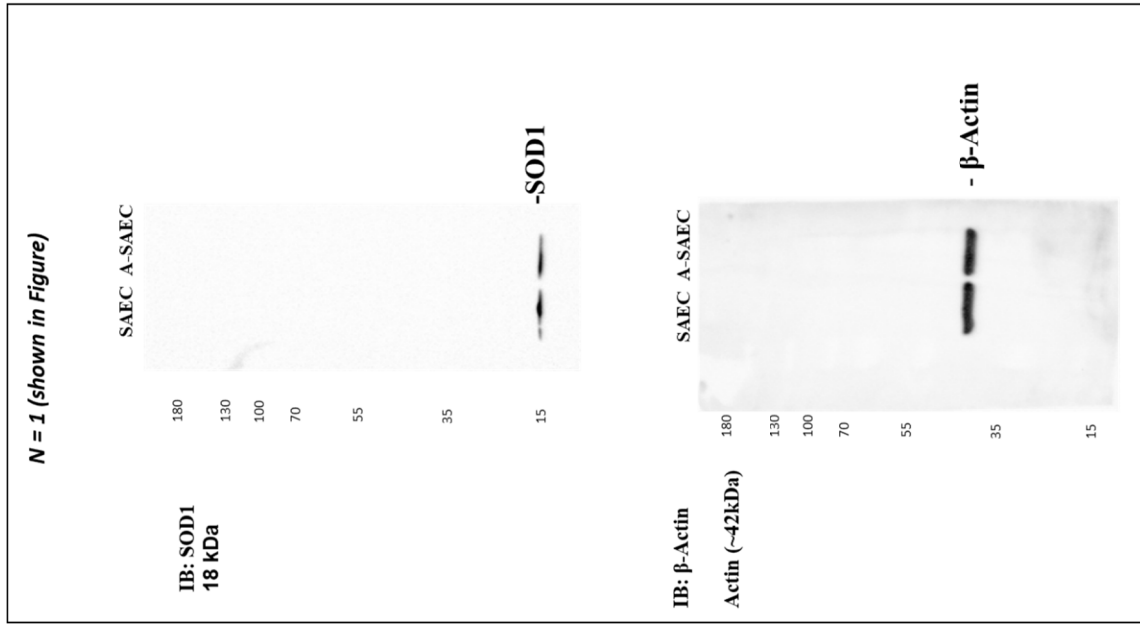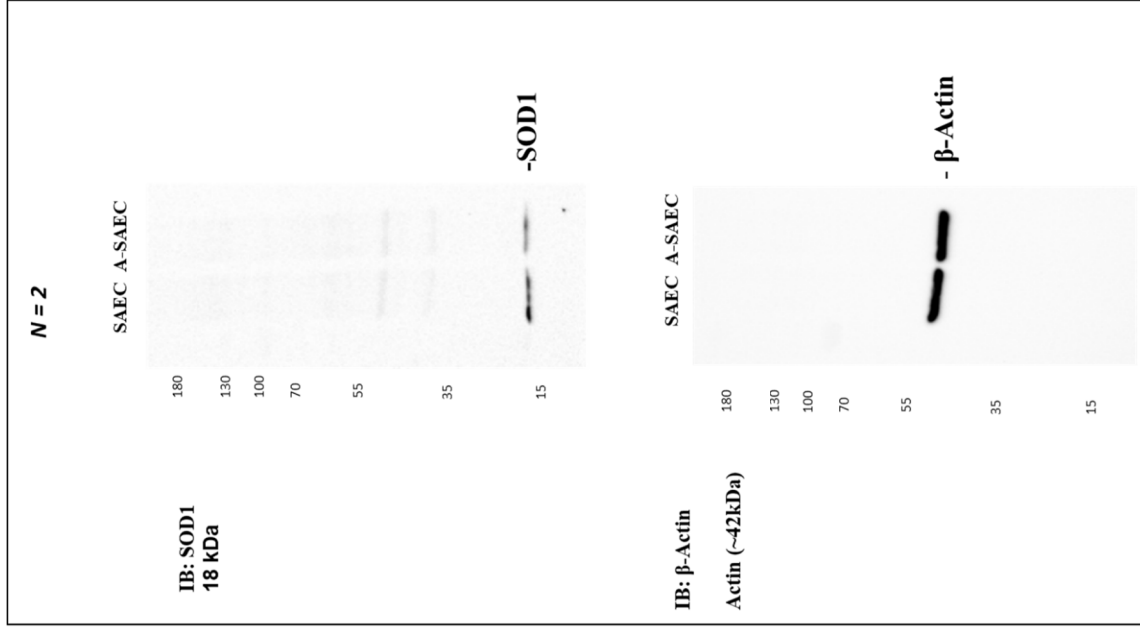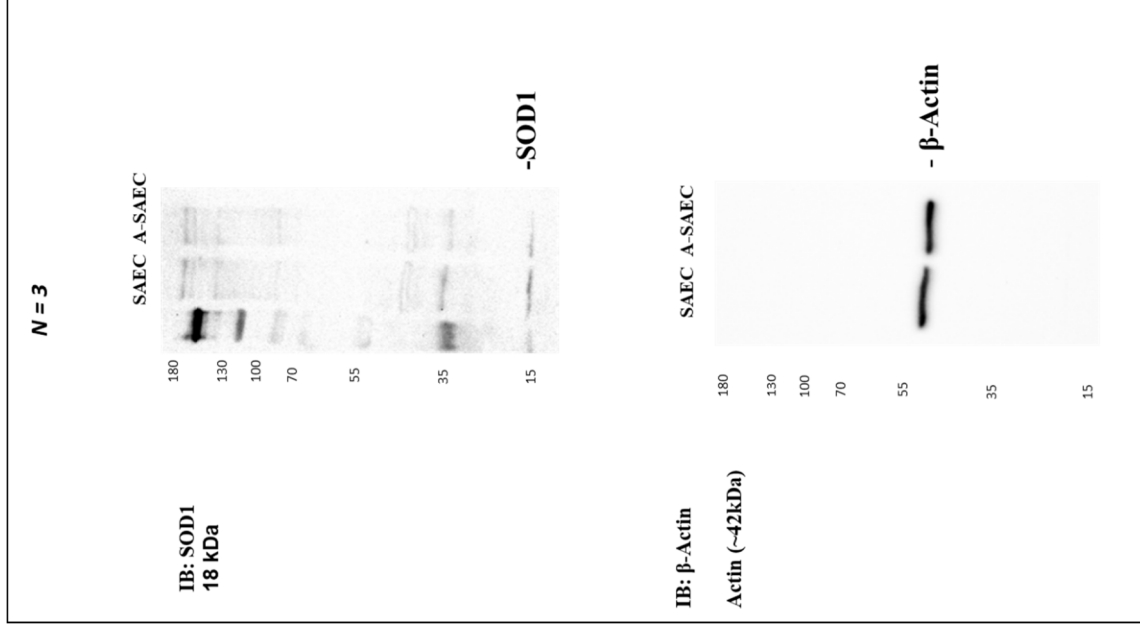

Full length immunoblot replicates from figure 6F (SOD2):

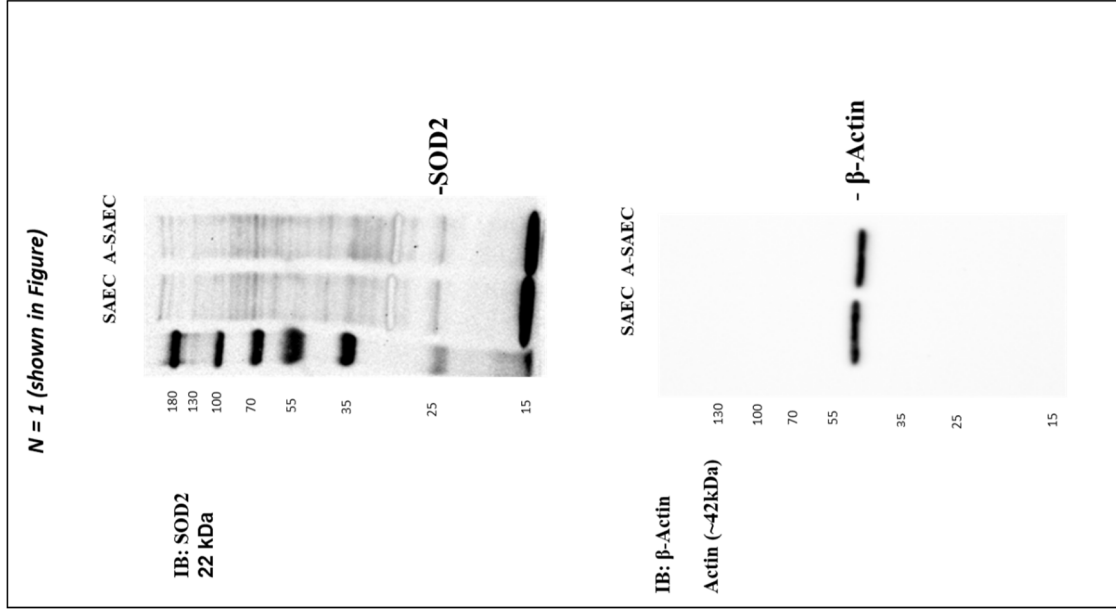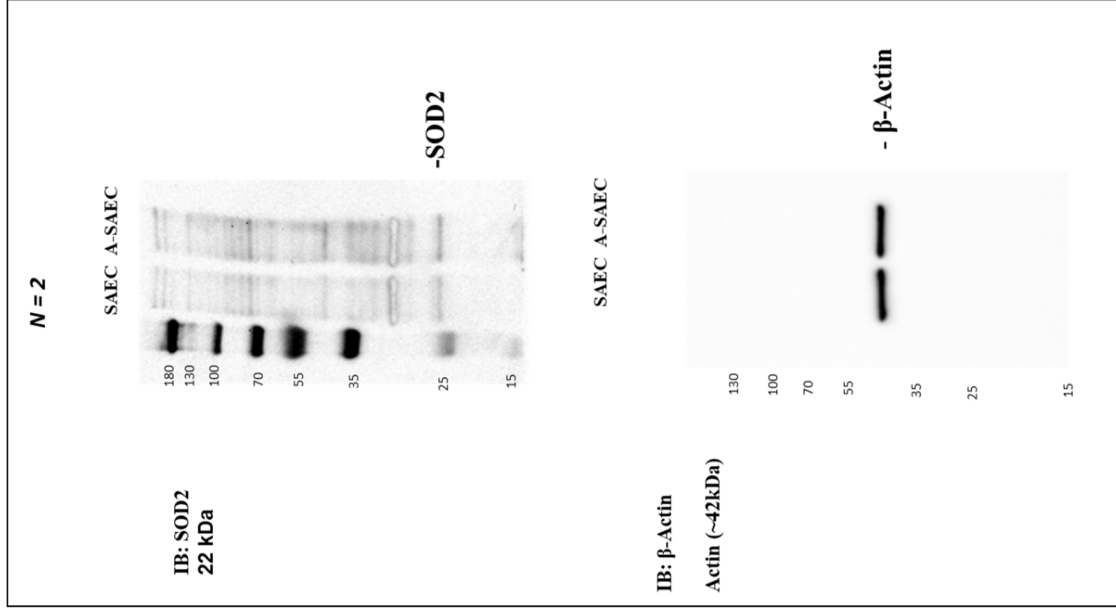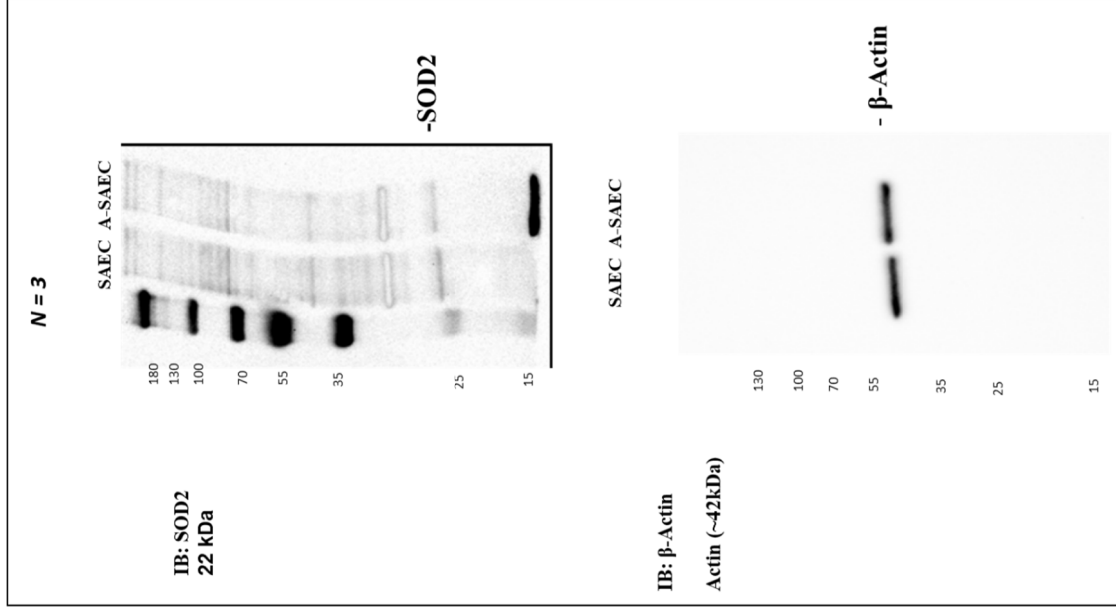



Full length immunoblot replicates from figure 6F (SOD3):

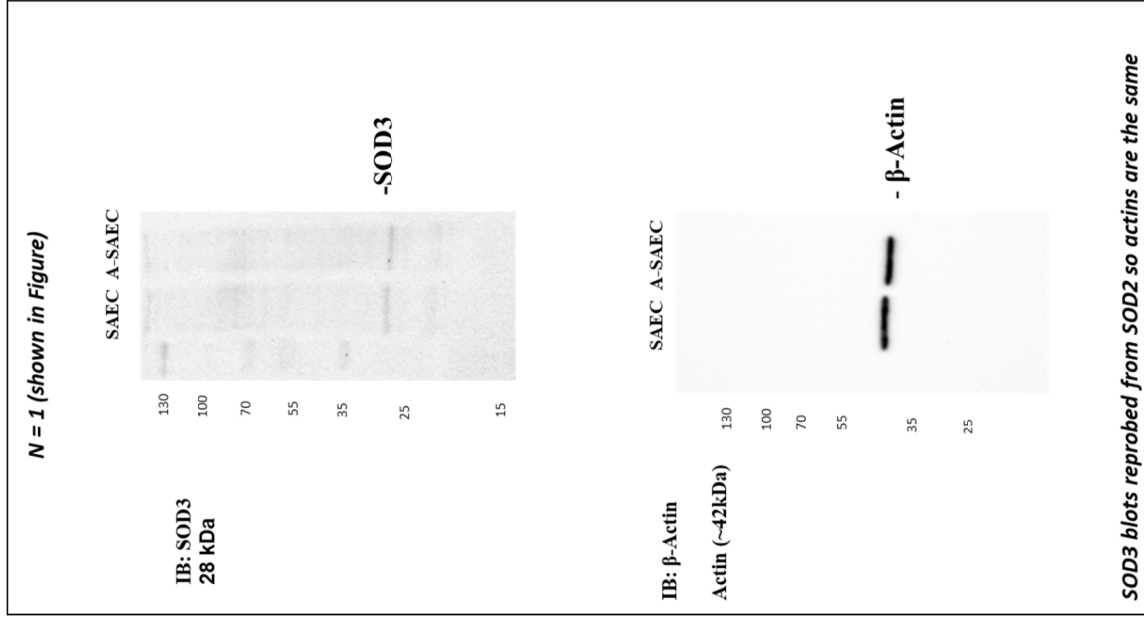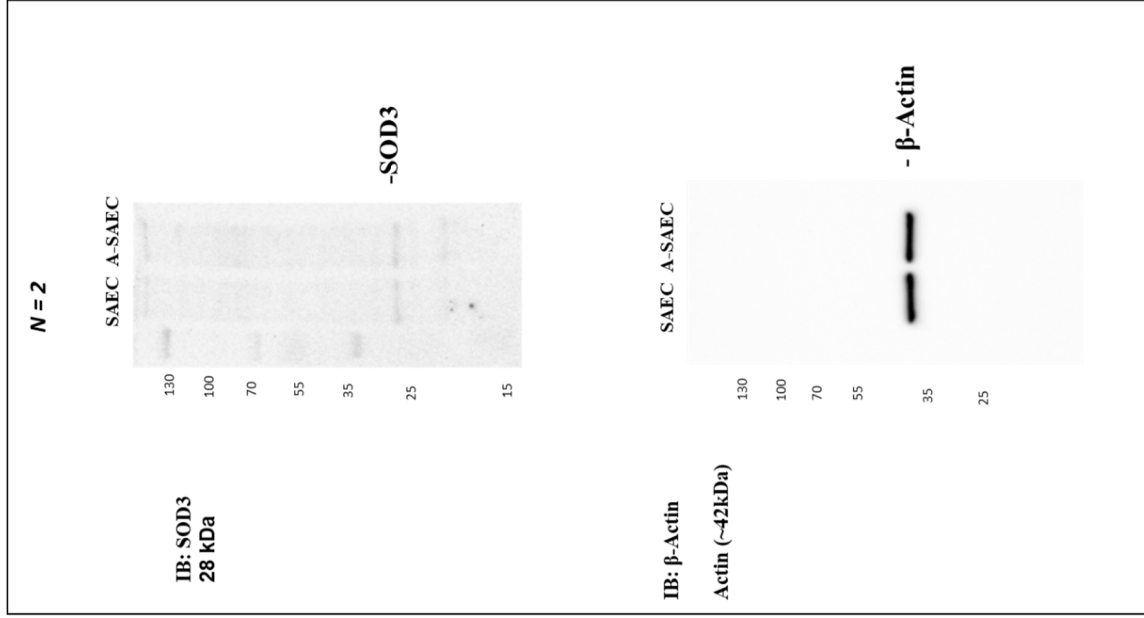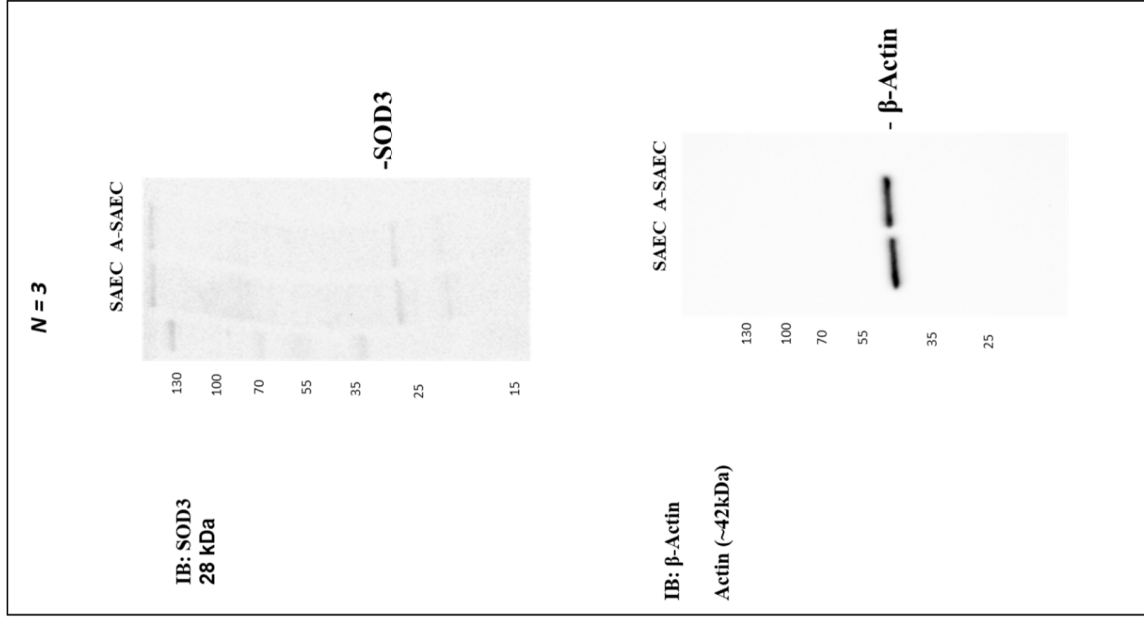

*SOD3 blots reprobed from SOD2 so actins are the same*

Full length immunoblot replicates from figure 6F (Catalase):

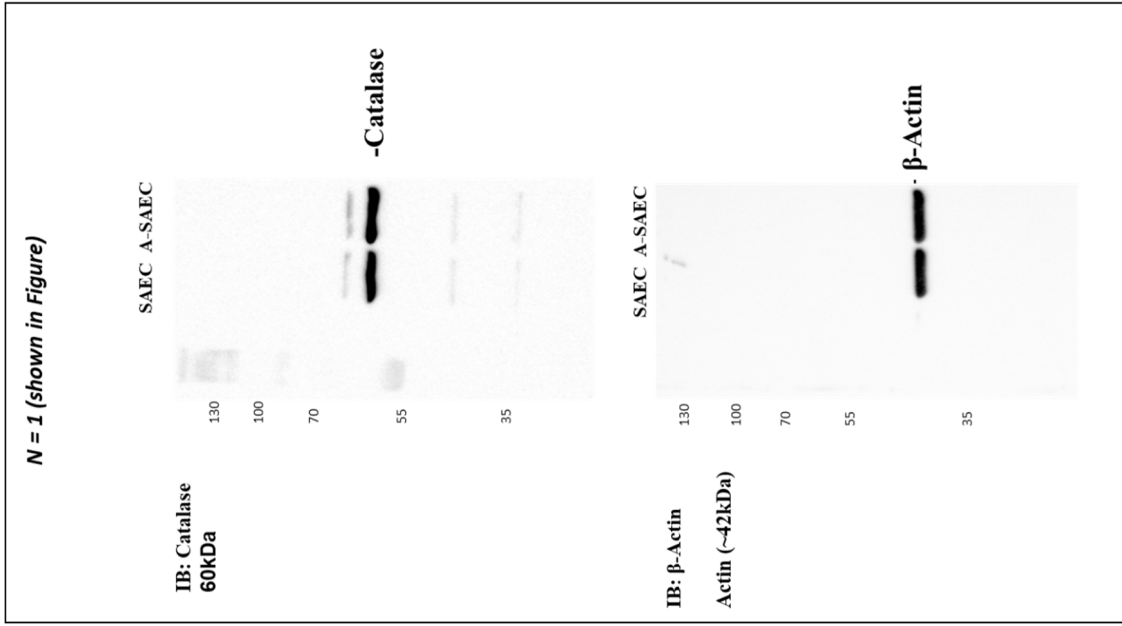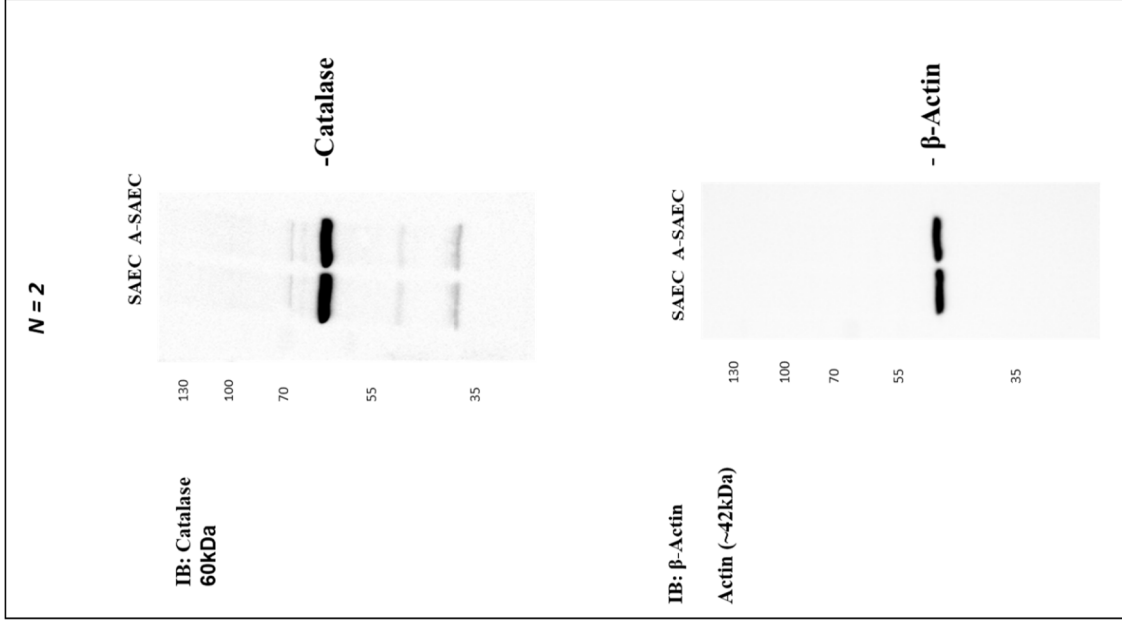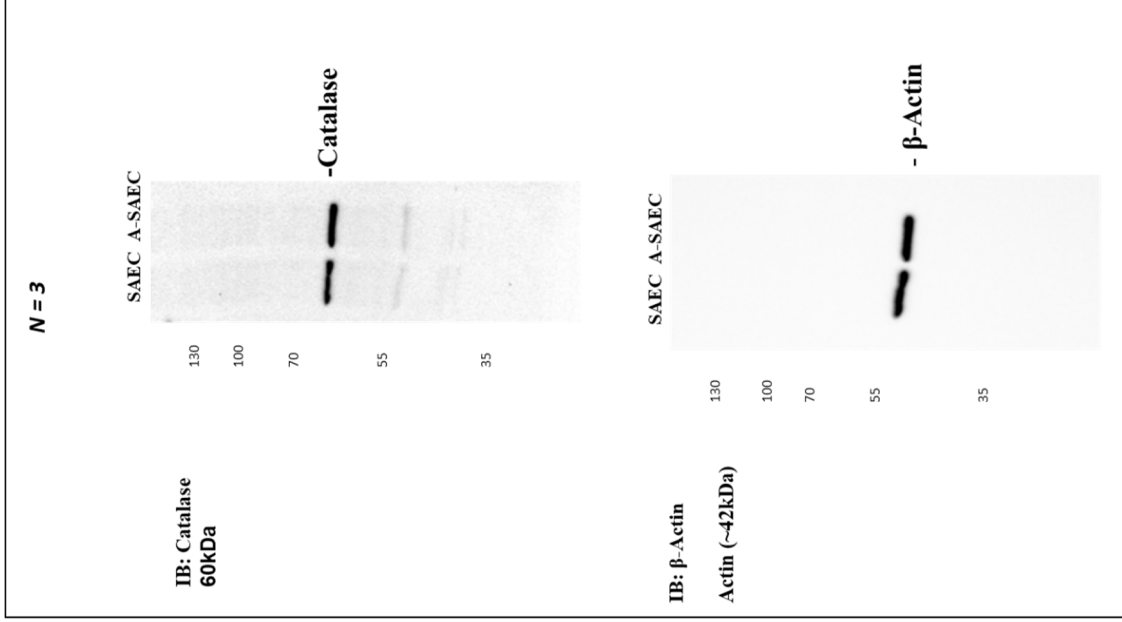

Supplement: NIHMS1940321-supplement-Supplementary_File.pdf [file NIHMS1940321-supplement-Supplementary_File.pdf]
